# Supplementary material for: New Transferrin Receptor-Targeted Peptide–Doxorubicin Conjugates: Synthesis and In Vitro Antitumor Activity
Source: MDPI journal article supplement (doi:10.3390/molecules29081758), 2024-04-12
Supplement: s1 [file s1]

# Supplementary material

## New Transferrin Receptor-Targeted Peptide–Doxorubicin Conjugates: Synthesis and In Vitro Antitumor Activity

Jiale Yu <sup>1</sup>, Xiaoxia Mao <sup>1</sup>, Xue Yang <sup>2</sup>, Guiqin Zhao <sup>1</sup> and Songtao Li <sup>1,\*</sup>

<sup>1</sup> Hebei Province Key Laboratory of Research and Development of Traditional Chinese Medicine, Institute of Chinese Materia Medica, Chengde Medical University, Chengde 067000, China; 15102526322@163.com (J.Y.); mao0505@163.com (X.M.); zhaoguiqin1971@sina.com (G.Z.)

<sup>2</sup> School of Basic Medical Sciences, Chengde Medical University, Chengde 067000, China; xyang\_cdmu@163.com

\* Correspondence: songtao-li@hotmail.com

### Contents

Characterization of DOX-SS-Pyr and the PDCs.....S1-S7

*In vitro* cytotoxicity of the <sup>L</sup>T7-SS-DOX conjugate.....S8

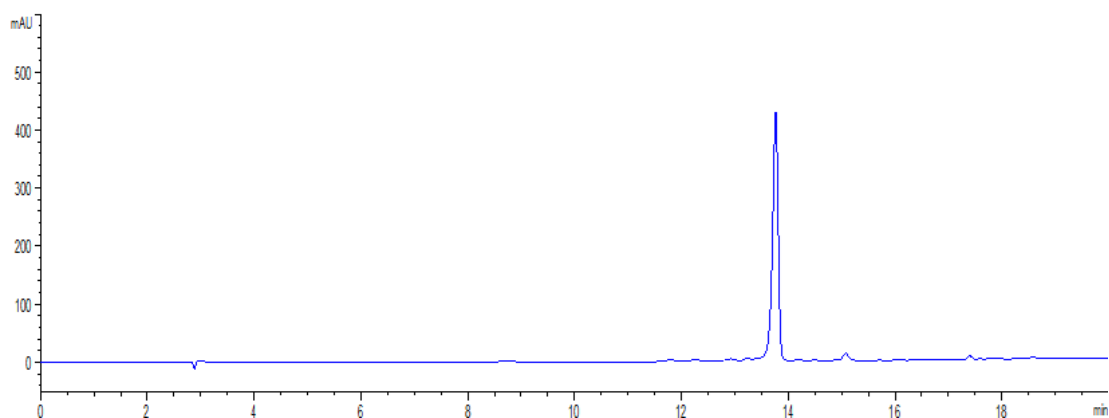

**Figure S1.** HPLC chromatogram of DOX-SS-Pyr

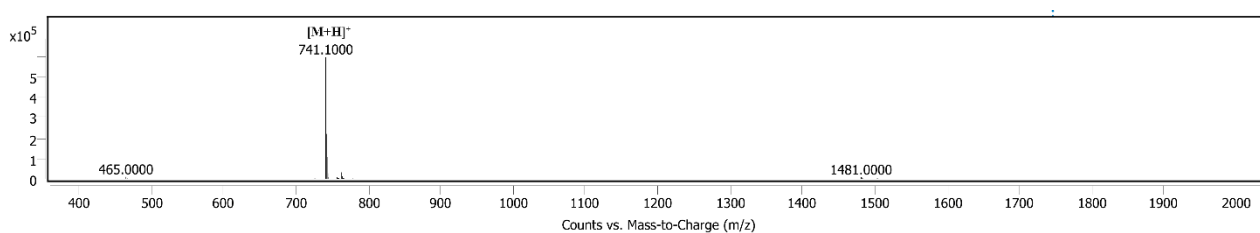

**Figure S2.** ESI MS of DOX-SS-Pyr, molecular weight for  
[C<sub>35</sub>H<sub>36</sub>N<sub>2</sub>O<sub>12</sub>S<sub>2</sub>]: calculated, 740.2; found, 741.1 [M + H]<sup>+</sup>

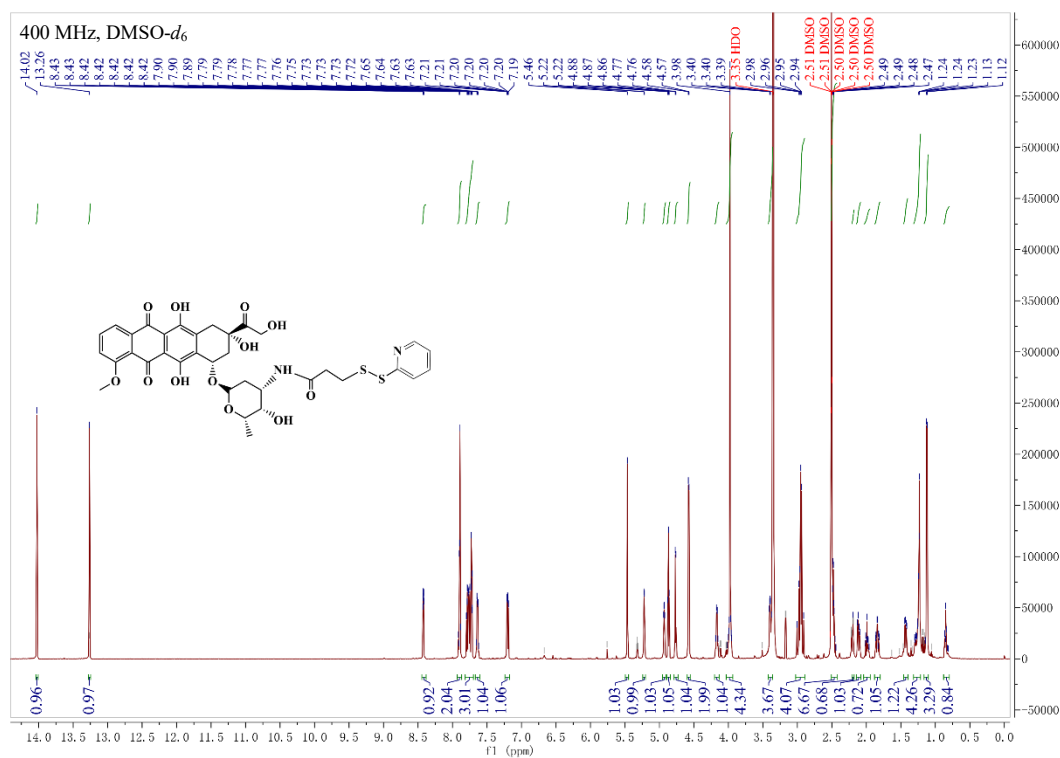

**Figure S3.** <sup>1</sup>H NMR spectrum of DOX-SS-Pyr

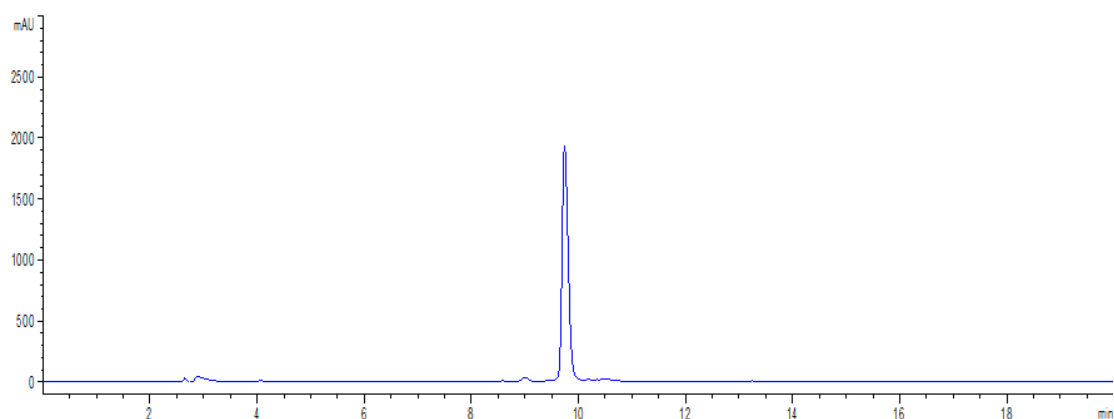

**Figure S4.** HPLC chromatogram of the <sup>L</sup>T7-SS-DOX conjugate

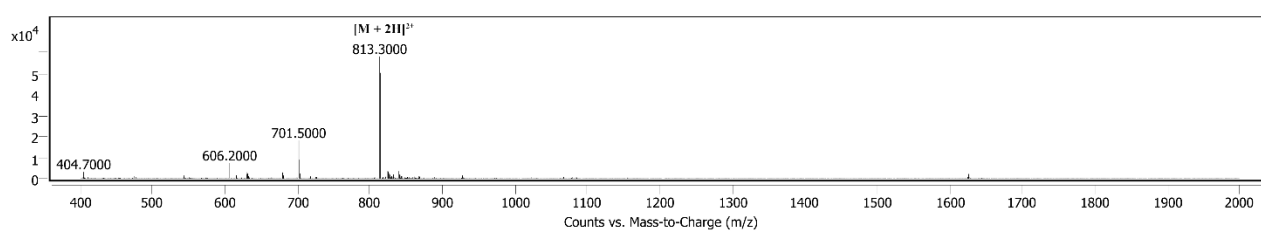

**Figure S5.** ESI MS of the <sup>L</sup>T7-SS-DOX conjugate, molecular weight for  $[C_{74}H_{96}N_{16}O_{22}S_2]$ : calculated, 1624.6; found, 813.3  $[M + 2H]^{2+}$

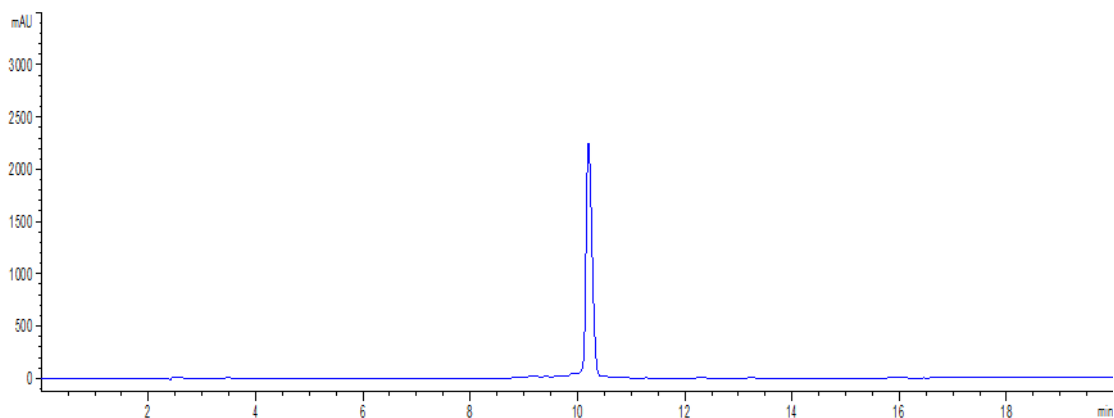

**Figure S6.** HPLC chromatogram of the <sup>D</sup>T7-SS-DOX conjugate

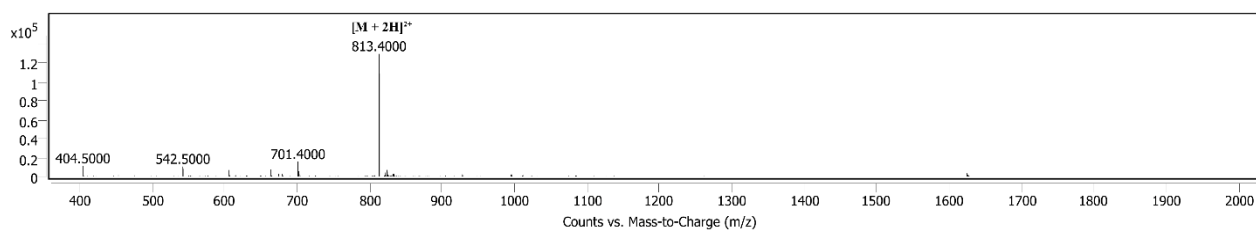

**Figure S7.** ESI MS of the <sup>D</sup>T7-SS-DOX conjugate, molecular weight for  $[C_{74}H_{96}N_{16}O_{22}S_2]$ : calculated, 1624.6; found, 813.4  $[M + 2H]^{2+}$

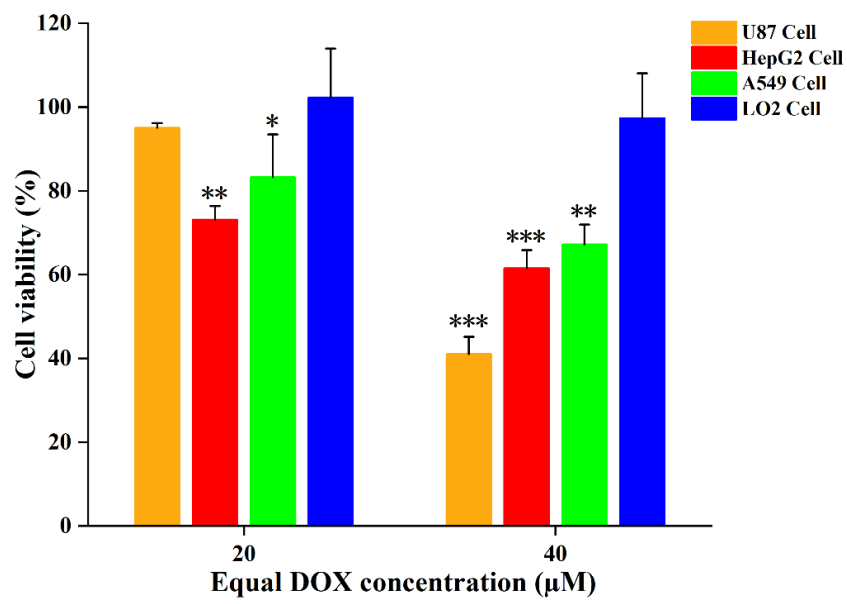

**Figure S8.** *In vitro* cytotoxicity of <sup>L</sup>T7-SS-DOX against cells. Data were presented as mean ± SD (n = 3), \**p* < 0.05; \*\**p* < 0.01 and \*\*\**p* < 0.001 versus LO2 cells group.
